# Supplementary material
Source: publisher figshare collection journal article supplement (https://sage.figshare.com/ndownloader/files/23349779)
Supplement: Supplementary file 1 [file 23349779]

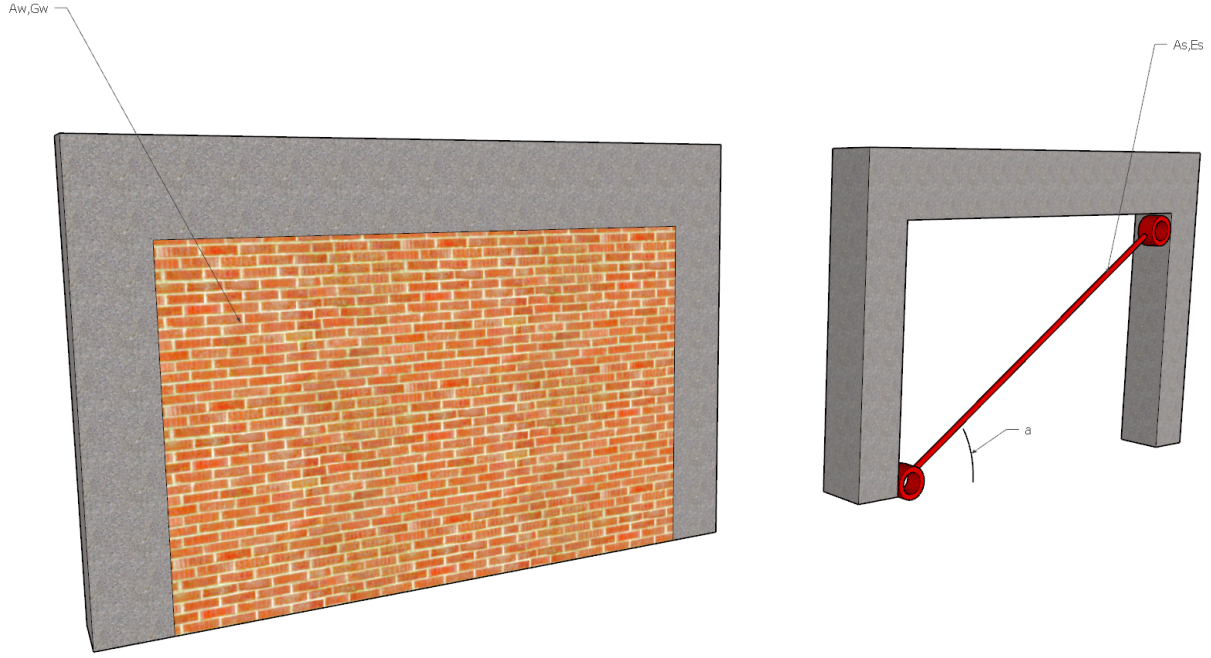

**Figure 11.** Sketch representing the RC frame and unreinforced masonry infill (left). Equivalent strut model (right).

614 The axial stiffness coefficient of the equivalent strut is estimated as a function of the shear  
 615 stiffness of the infill wall and the inclination of the strut, as shown in Equation 3.

$$E_S \cdot A_S = \frac{G_w \cdot A_w}{\cos^2 a \cdot \sin a} \quad (3)$$

## 616 SOIL

617 Table 5 shows the suggested parameter values, as found in OpenSees wiki. In our work, we  
 618 implement the soil models described in the main text adapting these values for the parameters  
 619 involved. In particular, upon selecting a specific value for the shear wave velocity characterizing  
 620 the soil profile, we use Equation 4 to estimate the corresponding soil shear modulus. To adapt  
 621 the values proposed in Table 5, we use linear interpolation between the values, with respect to  
 622 the shear moduli estimated.

$$G = V_s^2 \cdot \rho \quad (4)$$

**Table 5.** Suggested soil parameter values in OpenSees, as reported in the software wiki adapted from the USCD soil models. These values are initially reported in [Das \(1983\)](#); [Holtz and Kovacs \(1981\)](#); [Das \(1981\)](#), and should be used with caution and engineering judgement.

| Parameters                | Soft Clay               | Medium Clay             | Stiff Clay              |
|---------------------------|-------------------------|-------------------------|-------------------------|
| Soil mass density         | 1.3 ton/m <sup>3</sup>  | 1.5 ton/m <sup>3</sup>  | 1.8 ton/m <sup>3</sup>  |
| Low-strain shear modulus  | 1.3x10 <sup>4</sup> kPa | 6.0x10 <sup>4</sup> kPa | 1.5x10 <sup>5</sup> kPa |
| Bulk modulus              | 6.5x10 <sup>4</sup> kPa | 3.0x10 <sup>5</sup> kPa | 7.5x10 <sup>5</sup> kPa |
| Cohesion                  | 18 kPa                  | 37 kPa                  | 75 kPa                  |
| Shear strain at max shear | 0.1                     | 0.1                     | 0.1                     |
| Friction angle            | 0.0                     | 0.0                     | 0.0                     |

## RESPONSE SPECTRA

Indicatively, we present in Figures 12, 13 and 14 the normalized response spectra at the free field, for the soil profiles 2 ( $V_{s,30} = 450m/s$ ), 3 ( $V_{s,30} = 360m/s$ ), 5 ( $V_{s,30} = 250m/s$ ) and 6 ( $V_{s,30} = 180m/s$ ) according to Table 2, for PGA at bedrock level equal to 1 m/s<sup>2</sup>, 3 m/s<sup>2</sup> and 7 m/s<sup>2</sup>, respectively. Thick lines are the mean spectra, while light grey lines are the clouds of the free-field responses. In the same figures, we plot in colored lines the normalized EC8 response spectra referring to soil types B, C and D. We observe that, indeed, soil amplification is generally higher for lower PGA at bedrock.

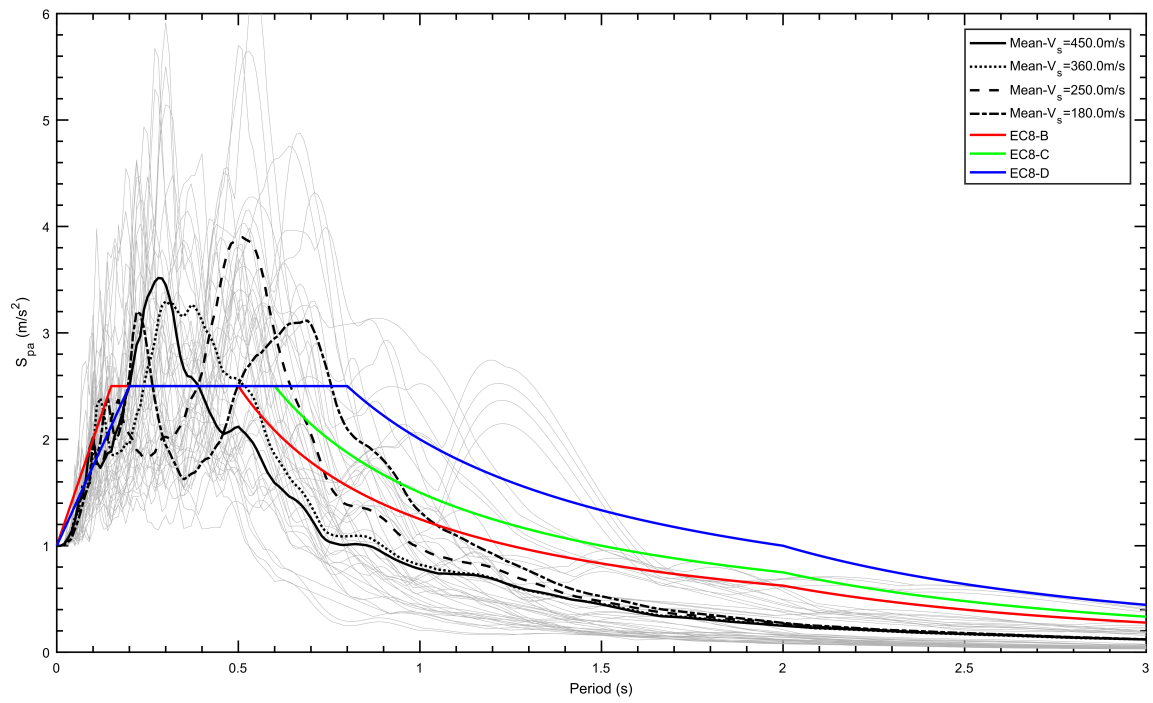

**Figure 12.** Normalized response spectra at the free field for the soil profiles 2, 3, 5 and 6 according to Table 2, for PGA at bedrock level equal to  $1 \text{ m/s}^2$ , and the corresponding mean spectra and normalized EC8 response spectra referring to soil types B, C and D.

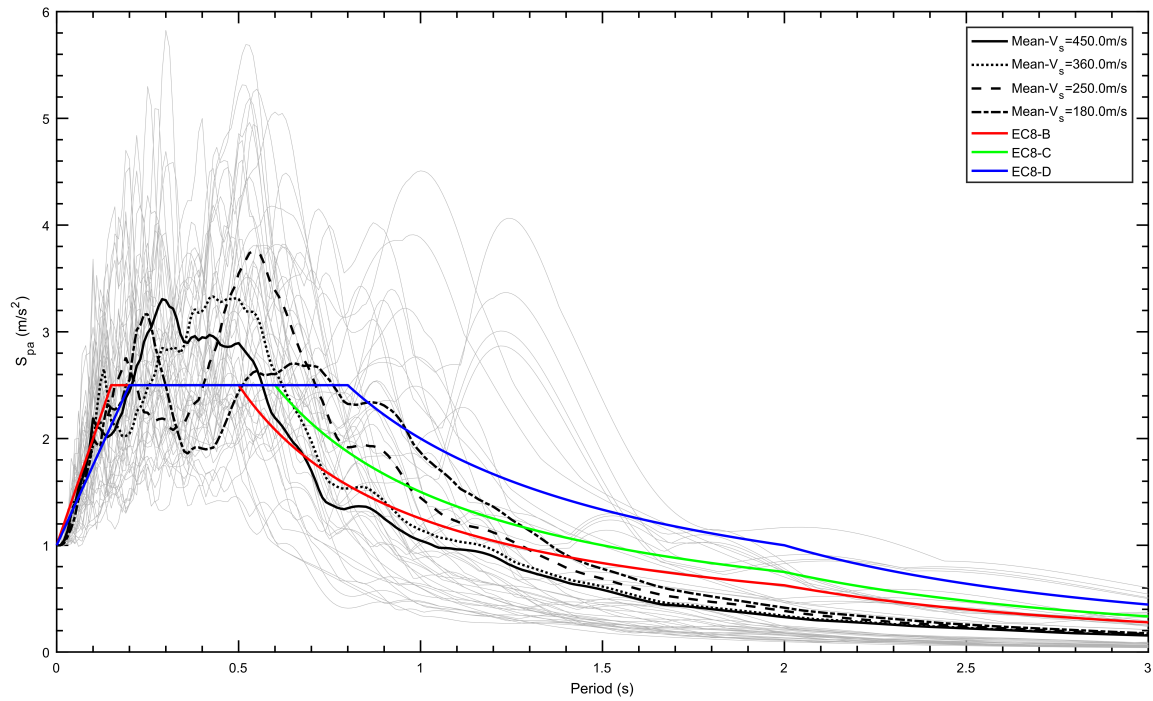

**Figure 13.** Normalized response spectra at the free field for the soil profiles 2, 3, 5 and 6 according to Table 2, for PGA at bedrock level equal to  $3 \text{ m/s}^2$ , and the corresponding mean spectra and normalized EC8 response spectra referring to soil types B, C and D.



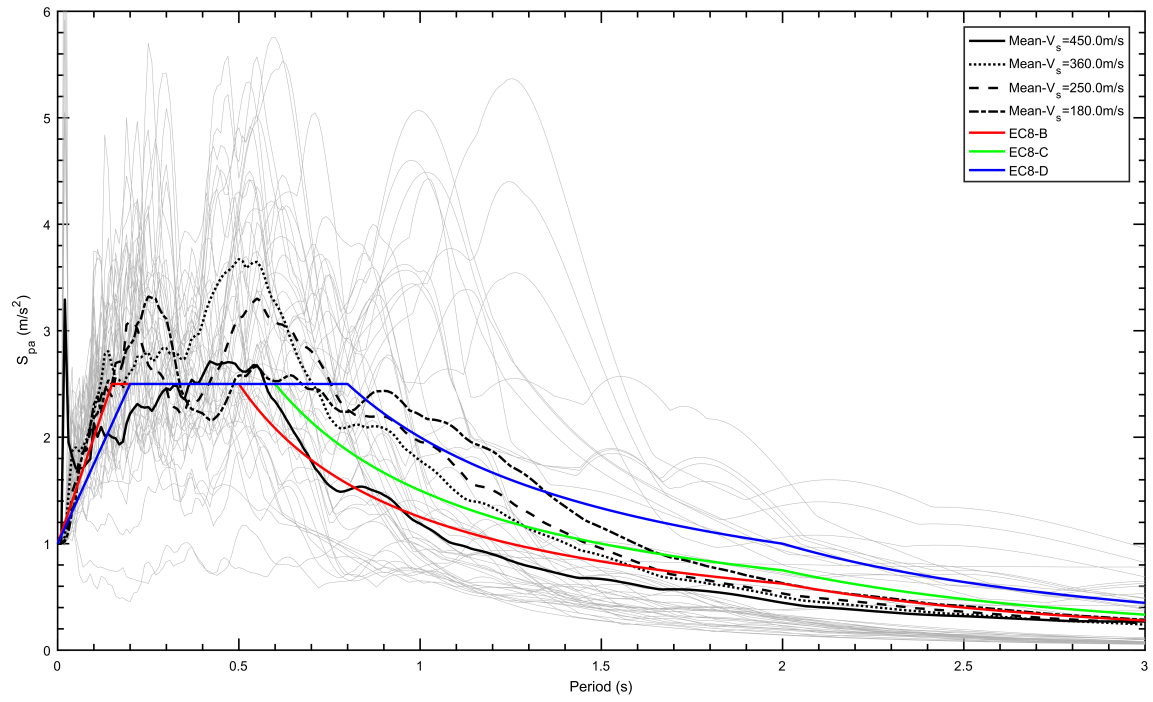

**Figure 14.** Normalized response spectra at the free field for the soil profiles 2, 3, 5 and 6 according to Table 2, for PGA at bedrock level equal to  $7 \text{ m/s}^2$ , and the corresponding mean spectra and normalized EC8 response spectra referring to soil types B, C and D.
